# Supplementary material for: Overexpression of CAPG Is Associated with Poor Prognosis and Immunosuppressive Cell Infiltration in Ovarian Cancer
Source: Hindawi journal article supplement (doi:10.1155/2022/9719671), 2022-02-09
Supplement: f1 [file 9719671.f1.zip]

Archive with 2 entries (2 files):
- supplemental tables (1).docx
- supplemental tables (2).pdf
