# Supplementary material for: Overexpression of CAPG Is Associated with Poor Prognosis and Immunosuppressive Cell Infiltration in Ovarian Cancer
Source: Hindawi journal article supplement (doi:10.1155/2022/9719671), 2022-02-09
Supplement: f1 [file 9719671.f1.zip › supplemental tables (1).docx]

| | TABLE S1. Clinical characteristics of the TCGA OV patients. | | |  | | --- | --- | --- | --- | | **Clinical characteristics** |  | **N** | **(%)** | | Age (years) | ≤50 | 90 | 24.2 | |  | >50 | 286 | 75.8 | | Race | Asian | 11 | 2.9 | |  | Non-Asian | 365 | 97.1 | | Histological type | Serous Cystadenocarcinoma | 376 | 100 | | Subdivision | Left | 55 | 14.6 | |  | Right | 46 | 12.2 | |  | Bilateral | 253 | 67.3 | |  | NA | 22 | 5.9 | | FIGO stage | I | 1 | 0.3 | |  | II | 22 | 5.8 | |  | III | 293 | 77.9 | |  | IV | 57 | 15.2 | |  | NA | 3 | 0.8 | | Grade | G1 | 1 | 0.3 | |  | G2 | 42 | 11.2 | |  | G3 | 322 | 85.6 | |  | NA | 11 | 2.9 | | Lymphatic invasion | Yes | 100 | 26.6 | |  | No | 48 | 12.8 | |  | NA | 228 | 60.6 | | Venous invasion | Yes | 63 | 16.8 | |  | No | 40 | 10.6 | |  | NA | 273 | 72.6 | | Residual tumor size | >20 mm | 70 | 18.6 | |  | 11-20 mm | 26 | 6.9 | |  | 1-10 mm | 171 | 45.5 | |  | No Macroscopic disease | 66 | 17.6 | |  | NA | 43 | 11.4 | | Primary therapy outcomes | SD+PD | 47 | 12.5 | |  | CR+PR | 258 | 68.6 | |  | NA | 71 | 18.9 | | Platinum-free interval | Platinum-sensitive | 131 | 34.8 | |  | Partially platinum-sensitive | 66 | 17.5 | |  | Platinum-resistant | 75 | 20 | |  | Platinum-refractory | 24 | 6.4 | |  | NA | 80 | 21.3 | | New tumor event after initial treatment | Locoregional disease | 4 | 1.1 | |  | Recurrence | 200 | 53.2 | |  | Progression of disease | 19 | 5.1 | |  | NA | 153 | 40.7 | | Vital status | Dead | 230 | 61.2 | |  | Alive | 146 | 38.8 |   TABLE S2. *CAPG* Positivel/ Negatively Correlated Significant Genes. | | | |
| --- | --- | --- | --- | --- | --- | --- | --- | --- | --- | --- | --- | --- | --- | --- | --- | --- | --- | --- | --- | --- | --- | --- | --- | --- | --- | --- | --- | --- | --- | --- | --- | --- | --- | --- | --- | --- | --- | --- | --- | --- | --- | --- | --- | --- | --- | --- | --- | --- | --- | --- | --- | --- | --- | --- | --- | --- | --- | --- | --- | --- | --- | --- | --- | --- | --- | --- | --- | --- | --- | --- | --- | --- | --- | --- | --- | --- | --- | --- | --- | --- | --- | --- | --- | --- | --- | --- | --- | --- | --- | --- | --- | --- | --- | --- | --- | --- | --- | --- | --- | --- | --- | --- | --- | --- | --- | --- | --- | --- | --- | --- | --- | --- | --- | --- | --- | --- | --- | --- | --- | --- | --- | --- | --- | --- | --- | --- | --- | --- | --- | --- | --- | --- | --- | --- | --- | --- | --- | --- | --- | --- | --- | --- | --- | --- | --- | --- | --- | --- | --- | --- | --- | --- | --- | --- | --- | --- | --- | --- | --- | --- | --- | --- | --- | --- | --- | --- | --- | --- | --- | --- | --- | --- | --- | --- | --- | --- | --- | --- | --- | --- | --- | --- | --- |
| Target Gene/Attribute | Person Correlation | *p* value | FDR (BH) |
| CAPG | 1 | 1.00E-28 | 1.00E-24 |
| EMP3 | 0.572388 | 9.06E-28 | 9.07E-24 |
| HCST | 0.563109 | 9.56E-27 | 5.05E-23 |
| LST1 | 0.56289 | 1.01E-26 | 5.05E-23 |
| VAMP8 | 0.555233 | 6.67E-26 | 2.67E-22 |
| TYROBP | 0.549155 | 2.88E-25 | 9.62E-22 |
| SPI1 | 0.547563 | 4.21E-25 | 1.20E-21 |
| GNGT2 | 0.54522 | 7.32E-25 | 1.83E-21 |
| FCER1G | 0.540094 | 2.42E-24 | 5.39E-21 |
| TSPO | 0.535003 | 7.78E-24 | 1.56E-20 |
| GMFG | 0.524533 | 8.08E-23 | 1.47E-19 |
| GLRX | 0.517323 | 3.87E-22 | 6.04E-19 |
| AIF1 | 0.51726 | 3.92E-22 | 6.04E-19 |
| APOC1 | 0.515458 | 5.76E-22 | 8.24E-19 |
| RGS19 | 0.51421 | 7.51E-22 | 1.00E-18 |
| ABI3 | 0.512142 | 1.16E-21 | 1.46E-18 |
| IFI30 | 0.511173 | 1.43E-21 | 1.68E-18 |
| RHOG | 0.510368 | 1.69E-21 | 1.88E-18 |
| VAMP5 | 0.509799 | 1.90E-21 | 2.01E-18 |
| RRAS | 0.509156 | 2.18E-21 | 2.18E-18 |
| FUT7 | 0.508859 | 2.32E-21 | 2.21E-18 |
| NKG7 | 0.507251 | 3.24E-21 | 2.95E-18 |
| FTL | 0.506052 | 4.15E-21 | 3.61E-18 |
| TYMP | 0.500749 | 1.23E-20 | 1.03E-17 |
| CD48 | 0.499575 | 1.56E-20 | 1.25E-17 |
| RAC2 | 0.498011 | 2.14E-20 | 1.65E-17 |
| ANKRD22 | 0.495837 | 3.31E-20 | 2.45E-17 |
| ACAP1 | 0.493748 | 5.02E-20 | 3.59E-17 |
| ARHGDIB | 0.493302 | 5.48E-20 | 3.79E-17 |
| CCL5 | 0.491457 | 7.89E-20 | 5.27E-17 |
| TNFAIP8L2 | 0.490628 | 9.29E-20 | 6.00E-17 |
| LGALS1 | 0.488941 | 1.29E-19 | 8.09E-17 |
| GZMH | 0.488406 | 1.44E-19 | 8.71E-17 |
| CST7 | 0.487916 | 1.58E-19 | 9.30E-17 |
| ZNF84 | -0.4877 | 1.65E-19 | 9.42E-17 |
| CATSPER1 | 0.486405 | 2.12E-19 | 1.18E-16 |
| GNA15 | 0.485139 | 2.70E-19 | 1.45E-16 |
| CD37 | 0.485046 | 2.75E-19 | 1.45E-16 |
| NAGK | 0.484066 | 3.33E-19 | 1.71E-16 |
| IL2RG | 0.482367 | 4.61E-19 | 2.31E-16 |
| CLEC4E | 0.481501 | 5.44E-19 | 2.66E-16 |
| CD3D | 0.480488 | 6.59E-19 | 3.14E-16 |
| C1QA | 0.479443 | 8.04E-19 | 3.74E-16 |
| LY96 | 0.479074 | 8.62E-19 | 3.92E-16 |
| BLVRB | 0.478325 | 9.93E-19 | 4.42E-16 |
| PYCARD | 0.477511 | 1.16E-18 | 5.01E-16 |
| LY86 | 0.477425 | 1.18E-18 | 5.01E-16 |
| LPXN | 0.477003 | 1.27E-18 | 5.32E-16 |
| CTSW | 0.474726 | 1.95E-18 | 7.97E-16 |
| CLEC4A | 0.473307 | 2.54E-18 | 1.02E-15 |
| SLAMF8 | 0.472429 | 2.99E-18 | 1.17E-15 |
| ZNF660 | -0.47169 | 3.43E-18 | 1.27E-15 |
| ZNF605 | -0.46899 | 5.63E-18 | 1.98E-15 |
| ACVR2B | -0.46874 | 5.90E-18 | 2.00E-15 |
| DHX9 | -0.46114 | 2.33E-17 | 6.13E-15 |
| ZNF445 | -0.45431 | 7.76E-17 | 1.75E-14 |
| RC3H1 | -0.45312 | 9.55E-17 | 2.10E-14 |
| IKBKAP | -0.45296 | 9.81E-17 | 2.14E-14 |
| SETD2 | -0.45152 | 1.26E-16 | 2.52E-14 |
| RAD54L2 | -0.45047 | 1.51E-16 | 2.93E-14 |
| PTCH2 | -0.44787 | 2.36E-16 | 4.42E-14 |
| ZCCHC11 | -0.44355 | 4.90E-16 | 8.54E-14 |
| TAF1L | -0.44267 | 5.69E-16 | 9.83E-14 |
| KIAA1549 | -0.44249 | 5.87E-16 | 1.00E-13 |
| KLHL15 | -0.44107 | 7.44E-16 | 1.19E-13 |
| LOC144438 | -0.44042 | 8.29E-16 | 1.31E-13 |
| ZNF664 | -0.43912 | 1.03E-15 | 1.54E-13 |
| GXYLT1 | -0.43776 | 1.29E-15 | 1.84E-13 |
| ZNF192 | -0.43385 | 2.45E-15 | 3.27E-13 |
| ZNF621 | -0.43256 | 3.02E-15 | 3.96E-13 |
| RBM6 | -0.4306 | 4.15E-15 | 5.13E-13 |
| HIPK2 | -0.43009 | 4.50E-15 | 5.53E-13 |
| ALMS1 | -0.42881 | 5.53E-15 | 6.59E-13 |
| VPRBP | -0.42808 | 6.22E-15 | 7.24E-13 |
| ZSWIM5 | -0.42305 | 1.38E-14 | 1.50E-12 |
| NAA25 | -0.4228 | 1.44E-14 | 1.51E-12 |
| TOP2B | -0.42105 | 1.89E-14 | 1.95E-12 |
| ZNF10 | -0.42102 | 1.90E-14 | 1.95E-12 |
| SBNO1 | -0.41678 | 3.67E-14 | 3.60E-12 |
| IFT81 | -0.41655 | 3.80E-14 | 3.70E-12 |
| FBXL13 | -0.41617 | 4.03E-14 | 3.83E-12 |
| IREB2 | -0.4162 | 4.01E-14 | 3.83E-12 |
| UBN2 | -0.41597 | 4.15E-14 | 3.89E-12 |
| GTF3C4 | -0.41374 | 5.85E-14 | 5.09E-12 |
| TET1 | -0.4127 | 6.85E-14 | 5.82E-12 |
| EP400 | -0.41273 | 6.83E-14 | 5.82E-12 |
| SETD5 | -0.41234 | 7.24E-14 | 6.09E-12 |
| OTUD3 | -0.41039 | 9.72E-14 | 7.79E-12 |
| TAF1 | -0.41024 | 9.94E-14 | 7.90E-12 |
| LOC286367 | -0.40966 | 1.09E-13 | 8.50E-12 |
| NKTR | -0.40891 | 1.21E-13 | 9.36E-12 |
| ZNF268 | -0.40841 | 1.31E-13 | 9.94E-12 |
| USP47 | -0.40835 | 1.32E-13 | 9.95E-12 |
| RBM12 | -0.40795 | 1.40E-13 | 1.04E-11 |
| RGAG1 | -0.40743 | 1.52E-13 | 1.13E-11 |
| DNAH10 | -0.40719 | 1.57E-13 | 1.16E-11 |
| SON | -0.40678 | 1.67E-13 | 1.23E-11 |
| TPR | -0.40604 | 1.87E-13 | 1.35E-11 |
| MASP2 | -0.40578 | 1.94E-13 | 1.40E-11 |
| BCOR | -0.40555 | 2.01E-13 | 1.44E-11 |

| TABLE S3. The miRNA target and transcription factors networks of CAPG in OC. | | | | | |
| --- | --- | --- | --- | --- | --- |
| Enriched Category | Gene Set | Leading Edge Number | ES | NES | FDR |
| miRNA target | TGCACTT,MIR-519C,MIR-519B,MIR-519A | 119 | -0.46943 | -1.9088 | 0 |
|  | TGAATGT,MIR-181A,MIR-181B,MIR-181C,MIR-181D | 123 | -0.49921 | -2.0148 | 0 |
|  | AGCACTT,MIR-93,MIR-302A,MIR-302B,MIR-302C,MIR-302D,MIR-372,MIR-373,MIR-520E,MIR-520A,MIR-526B,MIR-520B,MIR-520C,MIR-520D | 110 | -0.48164 | -1.8706 | 0.000264 |
| Transcription Factor | RYTTCCTG_V$ETS2_B | 312 | 0.50563 | 1.9643 | 0 |
|  | V$PU1_Q6 | 73 | 0.53197 | 1.8329 | 0.000545 |
|  | V$COREBINDINGFACTOR_Q6 | 62 | 0.51866 | 1.8393 | 0.000636 |
|  | V$E2F_02 | 84 | -0.49494 | -1.8971 | 0.001263 |
|  | V$IRF_Q6 | 61 | 0.50016 | 1.7809 | 0.001526 |
|  | V$NFKAPPAB65_01 | 60 | 0.49793 | 1.7613 | 0.00156 |
|  | GCCATNTTG_V$YY1_Q6 | 144 | -0.48925 | -1.9409 | 0.001684 |
|  | V$E2F_Q3_01 | 69 | -0.462 | -1.7501 | 0.00259 |
|  | V$AP1_Q6 | 68 | 0.45965 | 1.6179 | 0.005846 |

Abbreviations: ES, Enrichment Score; NES, Normalized Enrichment Score; FDR, false discovery rate.
