# Supplementary material for: Overexpression of CAPG Is Associated with Poor Prognosis and Immunosuppressive Cell Infiltration in Ovarian Cancer
Source: Hindawi journal article supplement (doi:10.1155/2022/9719671), 2022-02-09
Supplement: f1 [file 9719671.f1.zip › supplemental tables (2).pdf]

TABLE S1. Clinical characteristics of the TCGA OV patients.

| Clinical characteristics                |                              | N   | (%)  |
|-----------------------------------------|------------------------------|-----|------|
| Age (years)                             | ≤50                          | 90  | 24.2 |
|                                         | >50                          | 286 | 75.8 |
| Race                                    | Asian                        | 11  | 2.9  |
|                                         | Non-Asian                    | 365 | 97.1 |
| Histological type                       | Serous Cystadenocarcinoma    | 376 | 100  |
| Subdivision                             | Left                         | 55  | 14.6 |
|                                         | Right                        | 46  | 12.2 |
|                                         | Bilateral                    | 253 | 67.3 |
|                                         | NA                           | 22  | 5.9  |
| FIGO stage                              | I                            | 1   | 0.3  |
|                                         | II                           | 22  | 5.8  |
|                                         | III                          | 293 | 77.9 |
|                                         | IV                           | 57  | 15.2 |
|                                         | NA                           | 3   | 0.8  |
| Grade                                   | G1                           | 1   | 0.3  |
|                                         | G2                           | 42  | 11.2 |
|                                         | G3                           | 322 | 85.6 |
|                                         | NA                           | 11  | 2.9  |
| Lymphatic invasion                      | Yes                          | 100 | 26.6 |
|                                         | No                           | 48  | 12.8 |
|                                         | NA                           | 228 | 60.6 |
| Venous invasion                         | Yes                          | 63  | 16.8 |
|                                         | No                           | 40  | 10.6 |
|                                         | NA                           | 273 | 72.6 |
| Residual tumor size                     | >20 mm                       | 70  | 18.6 |
|                                         | 11-20 mm                     | 26  | 6.9  |
|                                         | 1-10 mm                      | 171 | 45.5 |
|                                         | No Macroscopic disease       | 66  | 17.6 |
|                                         | NA                           | 43  | 11.4 |
| Primary therapy outcomes                | SD+PD                        | 47  | 12.5 |
|                                         | CR+PR                        | 258 | 68.6 |
|                                         | NA                           | 71  | 18.9 |
| Platinum-free interval                  | Platinum-sensitive           | 131 | 34.8 |
|                                         | Partially platinum-sensitive | 66  | 17.5 |
|                                         | Platinum-resistant           | 75  | 20   |
|                                         | Platinum-refractory          | 24  | 6.4  |
|                                         | NA                           | 80  | 21.3 |
| New tumor event after initial treatment | Locoregional disease         | 4   | 1.1  |
|                                         | Recurrence                   | 200 | 53.2 |
|                                         | Progression of disease       | 19  | 5.1  |
|                                         | NA                           | 153 | 40.7 |

|              |       |     |      |
|--------------|-------|-----|------|
| Vital status | Dead  | 230 | 61.2 |
|              | Alive | 146 | 38.8 |

TABLE S2. CAPG Positivel/ Negatively Correlated Significant Genes.

| Target Gene/Attribute | Person Correlation | <i>p</i> value | FDR (BH) |
|-----------------------|--------------------|----------------|----------|
| CAPG                  | 1                  | 1.00E-28       | 1.00E-24 |
| EMP3                  | 0.572388           | 9.06E-28       | 9.07E-24 |
| HCST                  | 0.563109           | 9.56E-27       | 5.05E-23 |
| LST1                  | 0.56289            | 1.01E-26       | 5.05E-23 |
| VAMP8                 | 0.555233           | 6.67E-26       | 2.67E-22 |
| TYROBP                | 0.549155           | 2.88E-25       | 9.62E-22 |
| SPI1                  | 0.547563           | 4.21E-25       | 1.20E-21 |
| GNGT2                 | 0.54522            | 7.32E-25       | 1.83E-21 |
| FCER1G                | 0.540094           | 2.42E-24       | 5.39E-21 |
| TSPO                  | 0.535003           | 7.78E-24       | 1.56E-20 |
| GMFG                  | 0.524533           | 8.08E-23       | 1.47E-19 |
| GLRX                  | 0.517323           | 3.87E-22       | 6.04E-19 |
| AIF1                  | 0.51726            | 3.92E-22       | 6.04E-19 |
| APOC1                 | 0.515458           | 5.76E-22       | 8.24E-19 |
| RGS19                 | 0.51421            | 7.51E-22       | 1.00E-18 |
| ABI3                  | 0.512142           | 1.16E-21       | 1.46E-18 |
| IFI30                 | 0.511173           | 1.43E-21       | 1.68E-18 |
| RHOG                  | 0.510368           | 1.69E-21       | 1.88E-18 |
| VAMP5                 | 0.509799           | 1.90E-21       | 2.01E-18 |
| RRAS                  | 0.509156           | 2.18E-21       | 2.18E-18 |
| FUT7                  | 0.508859           | 2.32E-21       | 2.21E-18 |
| NKG7                  | 0.507251           | 3.24E-21       | 2.95E-18 |
| FTL                   | 0.506052           | 4.15E-21       | 3.61E-18 |
| TYMP                  | 0.500749           | 1.23E-20       | 1.03E-17 |
| CD48                  | 0.499575           | 1.56E-20       | 1.25E-17 |
| RAC2                  | 0.498011           | 2.14E-20       | 1.65E-17 |
| ANKRD22               | 0.495837           | 3.31E-20       | 2.45E-17 |
| ACAP1                 | 0.493748           | 5.02E-20       | 3.59E-17 |
| ARHGDIB               | 0.493302           | 5.48E-20       | 3.79E-17 |
| CCL5                  | 0.491457           | 7.89E-20       | 5.27E-17 |
| TNFAIP8L2             | 0.490628           | 9.29E-20       | 6.00E-17 |
| LGALS1                | 0.488941           | 1.29E-19       | 8.09E-17 |
| GZMH                  | 0.488406           | 1.44E-19       | 8.71E-17 |
| CST7                  | 0.487916           | 1.58E-19       | 9.30E-17 |
| ZNF84                 | -0.4877            | 1.65E-19       | 9.42E-17 |
| CATSPER1              | 0.486405           | 2.12E-19       | 1.18E-16 |

|           |          |          |          |
|-----------|----------|----------|----------|
| GNA15     | 0.485139 | 2.70E-19 | 1.45E-16 |
| CD37      | 0.485046 | 2.75E-19 | 1.45E-16 |
| NAGK      | 0.484066 | 3.33E-19 | 1.71E-16 |
| IL2RG     | 0.482367 | 4.61E-19 | 2.31E-16 |
| CLEC4E    | 0.481501 | 5.44E-19 | 2.66E-16 |
| CD3D      | 0.480488 | 6.59E-19 | 3.14E-16 |
| C1QA      | 0.479443 | 8.04E-19 | 3.74E-16 |
| LY96      | 0.479074 | 8.62E-19 | 3.92E-16 |
| BLVRB     | 0.478325 | 9.93E-19 | 4.42E-16 |
| PYCARD    | 0.477511 | 1.16E-18 | 5.01E-16 |
| LY86      | 0.477425 | 1.18E-18 | 5.01E-16 |
| LPXN      | 0.477003 | 1.27E-18 | 5.32E-16 |
| CTSW      | 0.474726 | 1.95E-18 | 7.97E-16 |
| CLEC4A    | 0.473307 | 2.54E-18 | 1.02E-15 |
| SLAMF8    | 0.472429 | 2.99E-18 | 1.17E-15 |
| ZNF660    | -0.47169 | 3.43E-18 | 1.27E-15 |
| ZNF605    | -0.46899 | 5.63E-18 | 1.98E-15 |
| ACVR2B    | -0.46874 | 5.90E-18 | 2.00E-15 |
| DHX9      | -0.46114 | 2.33E-17 | 6.13E-15 |
| ZNF445    | -0.45431 | 7.76E-17 | 1.75E-14 |
| RC3H1     | -0.45312 | 9.55E-17 | 2.10E-14 |
| IKBKAP    | -0.45296 | 9.81E-17 | 2.14E-14 |
| SETD2     | -0.45152 | 1.26E-16 | 2.52E-14 |
| RAD54L2   | -0.45047 | 1.51E-16 | 2.93E-14 |
| PTCH2     | -0.44787 | 2.36E-16 | 4.42E-14 |
| ZCCHC11   | -0.44355 | 4.90E-16 | 8.54E-14 |
| TAF1L     | -0.44267 | 5.69E-16 | 9.83E-14 |
| KIAA1549  | -0.44249 | 5.87E-16 | 1.00E-13 |
| KLHL15    | -0.44107 | 7.44E-16 | 1.19E-13 |
| LOC144438 | -0.44042 | 8.29E-16 | 1.31E-13 |
| ZNF664    | -0.43912 | 1.03E-15 | 1.54E-13 |
| GXYLT1    | -0.43776 | 1.29E-15 | 1.84E-13 |
| ZNF192    | -0.43385 | 2.45E-15 | 3.27E-13 |
| ZNF621    | -0.43256 | 3.02E-15 | 3.96E-13 |
| RBM6      | -0.4306  | 4.15E-15 | 5.13E-13 |
| HIPK2     | -0.43009 | 4.50E-15 | 5.53E-13 |
| ALMS1     | -0.42881 | 5.53E-15 | 6.59E-13 |
| VPRBP     | -0.42808 | 6.22E-15 | 7.24E-13 |
| ZSWIM5    | -0.42305 | 1.38E-14 | 1.50E-12 |
| NAA25     | -0.4228  | 1.44E-14 | 1.51E-12 |
| TOP2B     | -0.42105 | 1.89E-14 | 1.95E-12 |
| ZNF10     | -0.42102 | 1.90E-14 | 1.95E-12 |
| SBNO1     | -0.41678 | 3.67E-14 | 3.60E-12 |
| IFT81     | -0.41655 | 3.80E-14 | 3.70E-12 |

|           |          |          |          |
|-----------|----------|----------|----------|
| FBXL13    | -0.41617 | 4.03E-14 | 3.83E-12 |
| IREB2     | -0.4162  | 4.01E-14 | 3.83E-12 |
| UBN2      | -0.41597 | 4.15E-14 | 3.89E-12 |
| GTF3C4    | -0.41374 | 5.85E-14 | 5.09E-12 |
| TET1      | -0.4127  | 6.85E-14 | 5.82E-12 |
| EP400     | -0.41273 | 6.83E-14 | 5.82E-12 |
| SETD5     | -0.41234 | 7.24E-14 | 6.09E-12 |
| OTUD3     | -0.41039 | 9.72E-14 | 7.79E-12 |
| TAF1      | -0.41024 | 9.94E-14 | 7.90E-12 |
| LOC286367 | -0.40966 | 1.09E-13 | 8.50E-12 |
| NKTR      | -0.40891 | 1.21E-13 | 9.36E-12 |
| ZNF268    | -0.40841 | 1.31E-13 | 9.94E-12 |
| USP47     | -0.40835 | 1.32E-13 | 9.95E-12 |
| RBM12     | -0.40795 | 1.40E-13 | 1.04E-11 |
| RGAG1     | -0.40743 | 1.52E-13 | 1.13E-11 |
| DNAH10    | -0.40719 | 1.57E-13 | 1.16E-11 |
| SON       | -0.40678 | 1.67E-13 | 1.23E-11 |
| TPR       | -0.40604 | 1.87E-13 | 1.35E-11 |
| MASP2     | -0.40578 | 1.94E-13 | 1.40E-11 |
| BCOR      | -0.40555 | 2.01E-13 | 1.44E-11 |

TABLE S3. The miRNA target and transcription factors networks of CAPG in OC.

| Enriched<br>Category    | Gene Set                                                                                                                 | Leading<br>Edge | ES       | NES     | FDR      |
|-------------------------|--------------------------------------------------------------------------------------------------------------------------|-----------------|----------|---------|----------|
|                         |                                                                                                                          | Number          |          |         |          |
| miRNA<br>target         | TGCACTT,MIR-519C,MIR-519B,MIR-519A                                                                                       | 119             | -0.46943 | -1.9088 | 0        |
|                         | TGAATGT,MIR-181A,MIR-181B,MIR-181C,MIR-181D                                                                              | 123             | -0.49921 | -2.0148 | 0        |
|                         | AGCACTT,MIR-93,MIR-302A,MIR-302B,MIR-302C,MIR-302D,MIR-372,MIR-373,MIR-520E,MIR-520A,MIR-526B,MIR-520B,MIR-520C,MIR-520D | 110             | -0.48164 | -1.8706 | 0.000264 |
| Transcription<br>Factor | RYTTCCTG_V\$ETS2_B                                                                                                       | 312             | 0.50563  | 1.9643  | 0        |
|                         | V\$PU1_Q6                                                                                                                | 73              | 0.53197  | 1.8329  | 0.000545 |

|                         |     |          |         |          |
|-------------------------|-----|----------|---------|----------|
| V\$COREBINDINGFACTOR_Q6 | 62  | 0.51866  | 1.8393  | 0.000636 |
| V\$E2F_02               | 84  | -0.49494 | -1.8971 | 0.001263 |
| V\$IRF_Q6               | 61  | 0.50016  | 1.7809  | 0.001526 |
| V\$NFKAPPAB65_01        | 60  | 0.49793  | 1.7613  | 0.00156  |
| GCCATNTTG_V\$YY1_Q6     | 144 | -0.48925 | -1.9409 | 0.001684 |
| V\$E2F_Q3_01            | 69  | -0.462   | -1.7501 | 0.00259  |
| V\$AP1_Q6               | 68  | 0.45965  | 1.6179  | 0.005846 |

Abbreviations: ES, Enrichment Score; NES, Normalized Enrichment Score; FDR, false discovery rate.
